# Supplementary material for: Circadian Clock protein Bmal1 drives inflammatory homing in monocytes via augmented Cxcr4 and Ccr2 axis
Source: Research Square preprint supplement (doi:10.21203/rs.3.rs-8894070/v1), 2026-02-18
Supplement: Supplementary file 1 [file 7f027b59fbf33cb6ff066505.docx]

| **Criteria** | **Inclusion** | **Exclusion** |
| --- | --- | --- |
| **Age Group** | 20-40 years | <20 years or >40 years |
| **Health Condition** | Healthy individuals with no known diseases | Individuals with any diagnosed medical condition |
| **Medication Status** | Not on any medication | Individuals taking any form of medication |
| **Sleep-Wake Patterns and mental health** | Individuals with both regular & irregular sleep patterns for group classification with no history of psychiatric conditions | Individuals with extreme sleep disorders (e.g., diagnosed insomnia, narcolepsy) or depression, bipolar disorder etc. |
| **Smoking & Substance Use** | Non-smokers or occasional smokers | Heavy smokers or drug users, as nicotine and drugs alter circadian regulation |
| **Hypertension & Blood Pressure** | Normotensive individuals (BP <120/80 mmHg) | Individuals with hypertension (BP >130/80 mmHg) or on antihypertensive medication |

Supplementary Table 1: Inclusion & Exclusion criteria

Supplementary Table 2: Primers for RT-PCR

| **Gene** | **Forward** | **Reverse** |
| --- | --- | --- |
| *18s rRNA* | CGTTCAGCCACCCGAGATT | GACCCGCACTTACTGGGAATT |
| *Clock* | CGAGCGCTCCCGAATTTTTA | AGGTATCTAGTGAGACTTGCCA |
| *Bmal1* | GGCTCATAGATGCAAAAACTGG | CTCCAGAACATAATCGAGATGG |
| *Cxcr4* | CAGCAGGTAGCAAAGTGACG | GTAGATGGTGGGCAGGAAGA |
| *Ccr2* | TGGCTGTGTTTGCTTCTGTC | TCTCACTGCCCTATGCCTCT |
| *Pi3k* | GAACGAGTGGTTGGGCAATG | CCTCGCAACAGGTTTTCAGC |
| *Akt-1* | TTGGCTGCACAAACGAGGGGAGTAC | TGCGTTCGATGACAGTGGTCCAC |
| *Cdc42* | ACATCTGTTTGTGGATAACTCA | GGGAGCCATATACTCTTGGA |
| *Rac1* | ACCACTGTCCCAACACTCCCAT | TGGCTAGACCCTGCGGATAG |
| *mTor* | GCTTGATTTGGTTCCCAGGACAGT | GCTTGATTTGGTTCCCAGGACAGT |
